# Supplementary material for: Structural modulation and properties of four cadmium(ii) coordination architectures based on 3-(pyridin-4-yl)-5-(pyrazin-2-yl)-1H-1,2,4-triazole and aromatic polycarboxylate ligands
Source: Royal Society of Chemistry journal article supplement (doi:10.1039/c3ce41356j), 2013-01-01
Supplement: c3ce41356j.pdf [file c3ce41356j.pdf]

## Electronic supplementary information (ESI)

# Structural Modulation and Properties of Four Cadmium (II) Coordination Architectures Based on 3-(pyridin-4-yl)-5-(pyrazin-2-yl)-1H-1, 2, 4-triazole and Aromatic Polycarboxylate Ligands

Yu-Fang Wang,<sup>a, b</sup> Zhuo-Li,<sup>a</sup> Yan-Chun Sun,<sup>a</sup> Jian-She Zhao,<sup>\*a</sup> and Li-Ya Wang<sup>\*b</sup>

<sup>a</sup> Key Laboratory of Synthetic and Natural Functional Molecule Chemistry of Ministry of Education,  
College of Chemistry and Materials, Northwest University, Xi'an 710069, P. R. China

E-mail address: [jszhao@nwu.edu.cn](mailto:jszhao@nwu.edu.cn)

<sup>b</sup> College of Chemistry and Chemical Engineering, Luoyang Normal University, Luoyang 471022, P.  
R. China

E-mail address: [wlya@lynu.edu.cn](mailto:wlya@lynu.edu.cn)

Table S1. Selected bond lengths (Å) and bond angles (°) for **1**

|                   |             |                   |             |
|-------------------|-------------|-------------------|-------------|
| Cd(1)-N(4)        | 2.293(4)□   | Cd(1)-O(3)        | 2.430(4)□   |
| Cd(1)-O(1)        | 2.310(4)□   | Cd(1)-O(4)        | 2.483(4)□   |
| Cd(1)-O(2)        | 2.315(4)□   | N(4)-N(5)         | 1.373(6)□   |
| Cd(1)-N(6)#2      | 2.329(4)□   | N(6)-Cd(1)#3      | 2.329(4)    |
| O(1)-Cd(1)-N(6)#2 | 92.52(16)□  | N(4)-Cd(1)-O(4)   | 144.39(15)□ |
| O(2)-Cd(1)-N(6)#2 | 88.02(15)□  | O(1)-Cd(1)-O(4)   | 92.93(16)□  |
| N(4)-Cd(1)-O(3)   | 91.65(14)□  | O(2)-Cd(1)-O(4)   | 89.88(15)□  |
| O(1)-Cd(1)-O(3)   | 90.58(14)□  | N(6)#2-Cd(1)-O(4) | 77.85(15)□  |
| O(2)-Cd(1)-O(3)   | 91.16(13)□  | O(3)-Cd(1)-O(4)   | 52.93(14)   |
| N(6)#2-Cd(1)-O(3) | 130.77(14)□ | C(5)-N(4)-Cd(1)   | 126.3(3)□   |
| C(9)-N(6)-Cd(1)#3 | 123.2(4)    | N(5)-N(4)-Cd(1)   | 127.3(3)    |

Symmetry transformations used to generate equivalent atoms: #2 x, -y, z-1/2; #3 x, -y, z+1/2

Table S2. Selected bond lengths (Å) and bond angles (°) for **2**

|                    |             |                    |             |
|--------------------|-------------|--------------------|-------------|
| Cd(1)-N(9)         | 2.233(3)□   | Cd(3)-N(7)#3       | 2.359(3)□   |
| Cd(1)-O(4)         | 2.251(3)□   | Cd(3)-N(1)#4       | 2.361(3)□   |
| Cd(1)-N(12)#1      | 2.267(3)□   | Cd(3)-O(7)#2       | 2.415(3)□   |
| Cd(1)-O(6)         | 2.269(3)□   | Cd(3)-C(30)#2      | 2.705(4)□   |
| Cd(1)-O(3)         | 2.391(3)□   | O(2)-Cd(3)#2       | 2.282(3)□   |
| Cd(1)-N(8)         | 2.514(3)□   | O(7)-Cd(3)#2       | 2.415(3)□   |
| Cd(1)-C(38)        | 2.660(4)□   | O(8)-C(30)         | 1.258(4)□   |
| Cd(2)-N(3)         | 2.240(3)□   | O(8)-Cd(3)#2       | 2.304(3)□   |
| Cd(2)-N(6)#1       | 2.242(3)□   | N(1)-Cd(3)#4       | 2.361(3)□   |
| Cd(2)-O(5)         | 2.286(2)□   | N(6)-Cd(2)#5       | 2.242(3)□   |
| Cd(2)-O(11)        | 2.314(3)□   | N(7)-Cd(3)#6       | 2.359(3)□   |
| Cd(2)-N(2)         | 2.388(3)□   | N(12)-Cd(1)#5      | 2.267(3)    |
| Cd(2)-O(6)         | 2.619(3)□   | Cd(3)-O(2)#2       | 2.282(3)□   |
| Cd(3)-O(1)         | 2.271(2)□   | Cd(3)-O(8)#2       | 2.304(3)□   |
| N(9)-Cd(1)-O(4)    | 140.93(11)□ | N(9)-Cd(1)-O(6)    | 98.89(10)□  |
| N(9)-Cd(1)-N(12)#1 | 106.38(11)□ | O(4)-Cd(1)-O(6)    | 105.62(9)□  |
| O(4)-Cd(1)-N(12)#1 | 102.04(12)□ | N(12)#1-Cd(1)-O(6) | 93.47(11)□  |
| O(4)-Cd(1)-O(3)    | 56.09(9)□   | N(6)#1-Cd(2)-N(2)  | 172.12(11)□ |
| N(12)#1-Cd(1)-O(3) | 101.21(12)□ | O(5)-Cd(2)-N(2)    | 88.03(10)□  |
| O(6)-Cd(1)-O(3)    | 158.46(10)□ | O(11)-Cd(2)-N(2)   | 86.67(10)□  |
| N(9)-Cd(1)-N(8)    | 70.70(10)□  | N(3)-Cd(2)-O(6)    | 123.98(10)□ |
| O(4)-Cd(1)-N(8)    | 85.51(11)□  | N(6)#1-Cd(2)-O(6)  | 87.68(10)□  |
| N(12)#1-Cd(1)-N(8) | 169.37(10)□ | O(5)-Cd(2)-O(6)    | 52.34(8)□   |
| O(6)-Cd(1)-N(8)    | 77.16(10)□  | O(11)-Cd(2)-O(6)   | 139.59(9)□  |
| O(3)-Cd(1)-N(8)    | 89.19(11)□  | N(2)-Cd(2)-O(6)    | 88.82(9)□   |
| N(9)-Cd(1)-C(38)   | 117.12(12)□ | O(1)-Cd(3)-O(2)#2  | 123.54(10)□ |

|                     |             |                     |             |
|---------------------|-------------|---------------------|-------------|
| O(4)-Cd(1)-C(38)    | 28.10(10)°  | O(1)-Cd(3)-O(8)#2   | 91.00(9)°   |
| N(12)#1-Cd(1)-C(38) | 103.68(12)° | O(2)#2-Cd(3)-O(8)#2 | 144.30(9)°  |
| O(6)-Cd(1)-C(38)    | 132.72(10)° | O(1)-Cd(3)-N(7)#3   | 89.16(11)°  |
| O(3)-Cd(1)-C(38)    | 27.99(10)°  | O(2)#2-Cd(3)-N(7)#3 | 87.36(11)°  |
| N(8)-Cd(1)-C(38)    | 86.52(11)°  | O(8)#2-Cd(3)-N(7)#3 | 103.30(11)° |
| N(3)-Cd(2)-N(6)#1   | 104.58(11)° | O(1)-Cd(3)-N(1)#4   | 92.90(10)°  |
| N(3)-Cd(2)-O(5)     | 159.70(10)° | O(2)#2-Cd(3)-N(1)#4 | 83.22(11)°  |
| N(6)#1-Cd(2)-O(5)   | 95.40(11)°  | O(8)#2-Cd(3)-N(1)#4 | 86.61(11)°  |
| N(3)-Cd(2)-O(11)    | 92.38(11)°  | N(7)#3-Cd(3)-N(1)#4 | 169.86(10)° |
| N(6)#1-Cd(2)-O(11)  | 100.55(11)° | O(1)-Cd(3)-O(7)#2   | 144.38(9)°  |
| O(5)-Cd(2)-O(11)    | 87.36(9)°   | O(2)#2-Cd(3)-O(7)#2 | 91.89(9)°   |
| N(3)-Cd(2)-N(2)     | 71.70(10)°  | O(8)#2-Cd(3)-O(7)#2 | 55.01(9)°   |
| N(1)#4-Cd(3)-O(7)#2 | 95.06(10)   | N(7)#3-Cd(3)-O(7)#2 | 88.99(10)°  |

Symmetry transformations used to generate equivalent atoms: #1  $x+1, -y+3/2, z+1/2$ ; #2  $-x+3, -y+1, -z+2$ ;

#3  $x+1, y, z+1$ ; #4  $-x+2, -y+1, -z+1$ .

Table S3. Selected bond lengths (Å) and bond angles (°) for **3**

|                   |            |                 |             |
|-------------------|------------|-----------------|-------------|
| Cd(1)-O(4)#1      | 2.1738(18) | Cd(2)-O(10)     | 2.3305(19)° |
| Cd(1)-O(1)        | 2.2196(19) | Cd(2)-O(5A)#2   | 2.36(2)°    |
| Cd(1)-O(8)        | 2.306(2)°  | Cd(2)-N(6)#3    | 2.361(2)°   |
| Cd(1)-O(7)        | 2.323(2)°  | Cd(2)-O(9)      | 2.409(2)°   |
| Cd(1)-N(1)        | 2.339(2)°  | Cd(2)-O(6A)#2   | 2.41(2)°    |
| Cd(1)-O(2)        | 2.5812(17) | Cd(2)-N(2)      | 2.548(2)°   |
| Cd(2)-O(6)#2      | 2.281(5)°  | N(6)-Cd(2)#4    | 2.361(2)°   |
| Cd(2)-N(3)        | 2.312(2)°  | O(4)-Cd(1)#5    | 2.1738(18)° |
| O(6A)-Cd(2)#6     | 2.41(2)    | O(6)-Cd(2)#6    | 2.281(5)°   |
| O(5A)-Cd(2)#6     | 2.36(2)°   |                 |             |
| O(4)#1-Cd(1)-O(1) | 117.11(8)° | N(3)-Cd(2)-O(9) | 83.28(8)°   |

|                      |            |                       |            |
|----------------------|------------|-----------------------|------------|
| O(4)#1-Cd(1)-O(8)    | 87.96(8)°  | O(10)-Cd(2)-O(9)      | 175.77(7)° |
| O(1)-Cd(1)-O(8)      | 92.27(9)°  | O(5A)#2-Cd(2)-O(9)    | 87.5(11)°  |
| O(4)#1-Cd(1)-O(7)    | 95.78(8)°  | N(6)#3-Cd(2)-O(9)     | 94.47(8)°  |
| O(1)-Cd(1)-O(7)      | 90.87(9)°  | O(6)#2-Cd(2)-O(6A)#2  | 20.8(6)°   |
| O(8)-Cd(1)-O(7)      | 173.39(7)° | N(3)-Cd(2)-O(6A)#2    | 134.1(5)°  |
| O(4)#1-Cd(1)-N(1)    | 102.02(8)° | O(10)-Cd(2)-O(6A)#2   | 107.8(12)° |
| O(1)-Cd(1)-N(1)      | 140.87(7)° | O(5A)#2-Cd(2)-O(6A)#2 | 52.5(4)°   |
| O(8)-Cd(1)-N(1)      | 88.76(8)°  | N(6)#3-Cd(2)-O(6A)#2  | 72.7(3)°   |
| O(7)-Cd(1)-N(1)      | 85.13(8)°  | O(9)-Cd(2)-O(6A)#2    | 73.6(12)°  |
| O(4)#1-Cd(1)-O(2)    | 170.74(7)° | O(6)#2-Cd(2)-N(2)     | 157.7(3)°  |
| O(1)-Cd(1)-O(2)      | 54.11(6)°  | N(3)-Cd(2)-N(2)       | 69.35(7)°  |
| O(8)-Cd(1)-O(2)      | 95.05(7)°  | O(10)-Cd(2)-N(2)      | 89.37(7)°  |
| O(7)-Cd(1)-O(2)      | 82.10(7)°  | O(5A)#2-Cd(2)-N(2)    | 157.4(6)°  |
| N(1)-Cd(1)-O(2)      | 86.83(6)°  | N(6)#3-Cd(2)-N(2)     | 80.49(7)°  |
| O(6)#2-Cd(2)-O(10)   | 87.8(5)°   | O(9)-Cd(2)-N(2)       | 91.28(8)°  |
| N(3)-Cd(2)-O(10)     | 93.05(8)°  | O(6A)#2-Cd(2)-N(2)    | 147.7(7)°  |
| O(6)#2-Cd(2)-O(5A)#2 | 44.8(5)°   | N(3)-Cd(2)-N(6)#3     | 149.66(7)° |
| N(3)-Cd(2)-O(5A)#2   | 88.2(7)°   | O(10)-Cd(2)-N(6)#3    | 89.76(7)°  |
| O(10)-Cd(2)-O(5A)#2  | 90.3(11)°  | O(5A)#2-Cd(2)-N(6)#3  | 122.1(6)°  |
| O(6)#2-Cd(2)-N(6)#3  | 77.3(3)°   | O(6)#2-Cd(2)-O(9)     | 93.2(5)°   |

Symmetry transformations used to generate equivalent atoms: #1  $x+1/2, -y+1/2, z+1/2$ ;  
 #2  $x+1, y-1, z$ ; #3  $x+1/2, -y-1/2, z+1/2$ ; #4  $x-1/2, -y-1/2, z-1/2$ ; #5  $x-1/2, -y+1/2, z-1/2$ ; #6  $x-1, y+1, z$

Table S4. Selected bond lengths (Å) and bond angles (°) for **4**

|             |             |               |             |
|-------------|-------------|---------------|-------------|
| Cd(1)-O(1)  | 2.2349(18)° | Cd(2)-O(8)    | 2.465(2)°   |
| Cd(1)-O(5)  | 2.299(2)°   | Cd(2)-N(7)    | 2.475(2)°   |
| Cd(1)-N(10) | 2.323(2)°   | Cd(2)-N(4)    | 2.339(2)°   |
| Cd(1)-N(3)  | 2.328(2)°   | Cd(3)-O(2)#1  | 2.2455(19)° |
| Cd(1)-O(6)  | 2.359(2)°   | Cd(3)-N(12)#2 | 2.246(2)°   |

|                  |            |                      |             |
|------------------|------------|----------------------|-------------|
| Cd(1)-N(1)       | 2.449(2)□  | Cd(3)-O(3)#3         | 2.2611(19)□ |
| Cd(2)-O(7)       | 2.238(3)□  | Cd(3)-O(11)          | 2.2941(19)□ |
| Cd(2)-N(9)       | 2.310(2)□  | Cd(3)-O(10)          | 2.460(2)□   |
| Cd(2)-O(9)       | 2.321(2)□  | Cd(3)-O(4)#3         | 2.484(2)    |
| O(1)-Cd(1)-O(5)  | 92.74(8)□  | O(2)#1-Cd(3)-N(12)#2 | 111.96(7)□  |
| O(1)-Cd(1)-N(10) | 88.61(7)□  | O(2)#1-Cd(3)-O(3)#3  | 84.69(7)□   |
| O(5)-Cd(1)-N(10) | 104.18(8)□ | N(12)#2-Cd(3)-O(3)#3 | 142.54(7)□  |
| O(1)-Cd(1)-N(3)  | 171.74(8)□ | O(2)#1-Cd(3)-O(11)   | 93.26(7)□   |
| O(5)-Cd(1)-N(3)  | 92.61(8)□  | N(12)#2-Cd(3)-O(11)  | 111.22(8)□  |
| N(10)-Cd(1)-N(3) | 96.17(8)□  | O(3)#3-Cd(3)-O(11)   | 100.51(7)□  |
| O(1)-Cd(1)-O(6)  | 86.46(7)□  | O(2)#1-Cd(3)-O(10)   | 146.45(6)□  |
| O(5)-Cd(1)-O(6)  | 164.79(8)□ | N(12)#2-Cd(3)-O(10)  | 92.18(7)□   |
| N(10)-Cd(1)-O(6) | 90.99(8)□  | O(3)#3-Cd(3)-O(10)   | 89.86(7)□   |
| O(1)-Cd(1)-N(1)  | 103.80(7)□ | O(2)#1-Cd(3)-O(4)#3  | 110.10(7)□  |
| O(5)-Cd(1)-N(1)  | 78.72(8)□  | N(12)#2-Cd(3)-O(4)#3 | 87.49(7)□   |
| N(10)-Cd(1)-N(1) | 167.20(7)□ | O(3)#3-Cd(3)-O(4)#3  | 55.04(6)□   |
| N(3)-Cd(1)-N(1)  | 71.13(8)□  | O(11)-Cd(3)-O(4)#3   | 142.39(7)□  |
| O(6)-Cd(1)-N(1)  | 86.72(8)□  | O(10)-Cd(3)-O(4)#3   | 93.26(7)□   |
| N(9)-Cd(2)-O(9)  | 129.70(8)□ | O(7)-Cd(2)-N(7)      | 104.08(10)□ |
| O(7)-Cd(2)-N(4)  | 97.68(10)□ | N(9)-Cd(2)-N(7)      | 69.44(7)□   |
| O(7)-Cd(2)-O(8)  | 87.11(8)□  | O(8)-Cd(2)-N(7)      | 83.81(7)□   |

Symmetry transformations used to generate equivalent atoms: #1 x, y-1, z;  
 #2 -x+1, -y+1, -z+1; #3 x+1, y-1, z

Table S5. Hydrogen bonds for **1-4**

| <b>1</b>            |        |          |          |        |
|---------------------|--------|----------|----------|--------|
| D-H...A             | d(D-H) | d(H...A) | d(D...A) | ∠(DHA) |
| O(2)-H(4W)...O(3)#4 | 0.85   | 1.92     | 2.731(5) | 159.4□ |
| O(2)-H(3W)...N(5)#4 | 0.85   | 1.91     | 2.743(6) | 168.0□ |
| O(1)-H(2W)...N(3)#5 | 0.85   | 2.05     | 2.816(6) | 148.7□ |

|                         |      |      |           |        |
|-------------------------|------|------|-----------|--------|
| O(1)-H(1W)...O(5)#6     | 0.85 | 1.94 | 2.719(6)  | 151.6□ |
| O(5)-H(5W)...O(3)#7     | 0.94 | 1.93 | 2.869(7)  | 175.1□ |
| O(5)-H(6W)...N(2)#8     | 0.82 | 2.21 | 3.007(7)  | 162.2  |
| <b>2</b>                |      |      |           |        |
| O(11)-H(6W)...N(11)#10  | 0.85 | 1.92 | 2.741(4)  | 161.8□ |
| O(11)-H(5W)...O(1)#11   | 0.85 | 2.47 | 3.285(4)  | 161.0□ |
| O(10)-H(10A)...O(11)#12 | 0.85 | 2.68 | 2.935(15) | 99.3   |
| <b>3</b>                |      |      |           |        |
| O(10)-H(7W)...O(2)#7    | 0.85 | 1.91 | 2.759(2)  | 172.5□ |
| O(10)-H(8W)...N(5)#7    | 0.85 | 2.00 | 2.851(3)  | 176.9□ |
| O(9)-H(6W)...O(5)#8     | 0.85 | 2.10 | 2.852(13) | 147.7□ |
| O(9)-H(5W)...N(4)#9     | 0.85 | 2.51 | 3.259(3)  | 148.3□ |
| O(8)-H(4W)...O(9)#10    | 0.85 | 2.08 | 2.927(3)  | 172.4□ |
| O(8)-H(3W)...O(3)#8     | 0.85 | 1.75 | 2.602(3)  | 175.7□ |
| O(7)-H(2W)...N(4)#7     | 0.85 | 2.05 | 2.874(3)  | 162.7□ |
| O(7)-H(1W)...O(5A)#11   | 0.85 | 1.94 | 2.715(17) | 150.1□ |
| O(7)-H(1W)...O(5)#11    | 0.85 | 1.91 | 2.636(8)  | 142.2  |
| <b>4</b>                |      |      |           |        |
| O(14)-H(12W)...O(2)#8   | 0.85 | 2.50 | 3.046(3)□ | 123.0  |
| O(14)-H(12W)...O(3)     | 0.85 | 2.14 | 2.917(3)  | 152.0□ |
| O(14)-H(11W)...O(6)#8   | 0.85 | 2.10 | 2.945(4)  | 179.6□ |
| O(13)-H(10W)...O(9)#8   | 0.85 | 1.96 | 2.796(3)  | 167.8□ |
| O(13)-H(9W)...N(2)#9    | 0.85 | 2.00 | 2.822(4)  | 163.7□ |
| O(12)-H(8W)...O(10)#8   | 0.85 | 2.32 | 3.118(4)  | 157.3□ |
| O(12)-H(7W)...N(6)#10   | 0.85 | 2.04 | 2.840(4)  | 156.1□ |
| O(7)-H(5W)...O(12)      | 0.85 | 1.80 | 2.644(4)  | 170.9□ |
| O(6)-H(4W)...N(8)#11    | 0.85 | 1.96 | 2.766(3)  | 158.0□ |
| O(6)-H(3W)...O(13)#12   | 0.85 | 2.06 | 2.843(3)  | 152.2□ |
| O(5)-H(2W)...N(5)#9     | 0.85 | 2.06 | 2.900(3)  | 171.4□ |

O(5)-H(1W)...O(14) 0.85 1.80 2.647(3) 172.3

Symmetry codes for **1**: #4  $-x+1/2, -y-1/2, -z$ ; #5  $-x+1/2, -y+1/2, -z$ ; #6  $-x+1, -y+1, -z$ ; #7  $x, y+1, z$ ; #8  $-x+1/2, -y+3/2, -z$ ; for **2**: #10  $x+1, y, z$ ; #11  $x, y, z-1$ ; #12  $x-1, -y+3/2, z+1/2$ ; for **3**: #7  $-x+1, -y, -z$ ; #8  $-x, -y, -z$ ; #9  $-x+1, -y-1, -z$ ; #10  $-x+1/2, y+1/2, -z+1/2$ ; #11  $-x, -y+1, -z$ ; for **4**: #8  $x-1, y, z$ ; #9  $-x+1, -y+1, -z+2$ ; #10  $-x+1, -y, -z+2$ ; #11  $-x+2, -y+1, -z+1$ ; #12  $x+1, y, z$ .

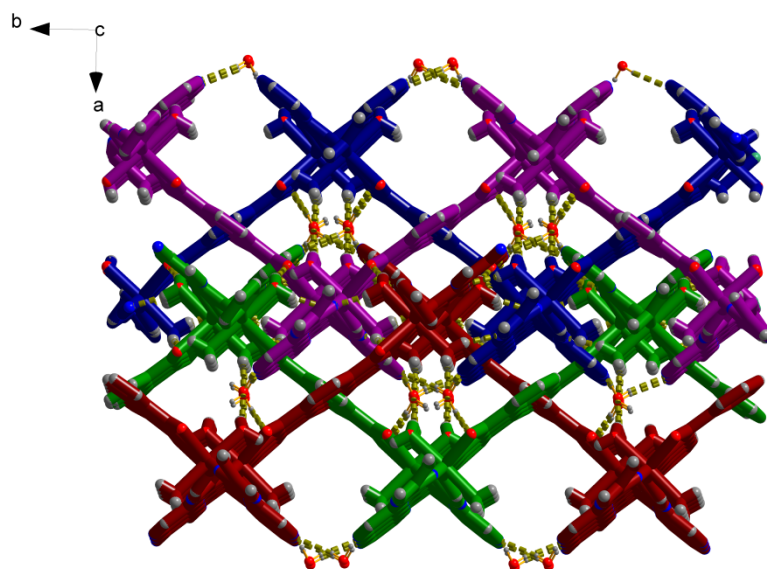

Fig. S1 View of 3D supramolecular structure of **1**.

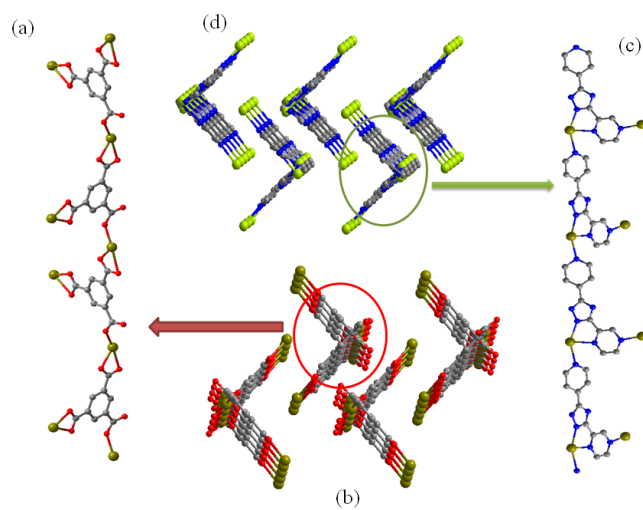

Fig. S2 (a) 1D chain of **3** formed by Cd–btc<sup>3-</sup>; (b) Packing of 1D Cd–btc<sup>3-</sup> chains; (c) 1D chain of **3** formed by Cd–ppt<sup>-</sup>; (d) Packing of 1D Cd–ppt<sup>-</sup> chains.

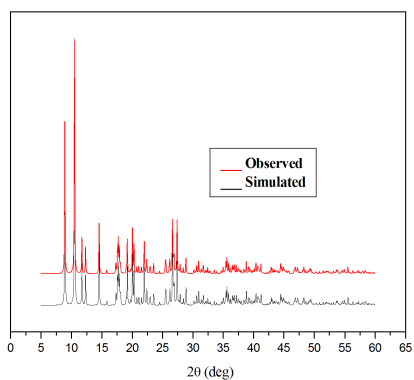

(a)

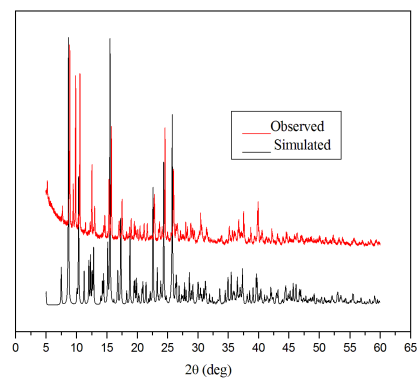

(b)

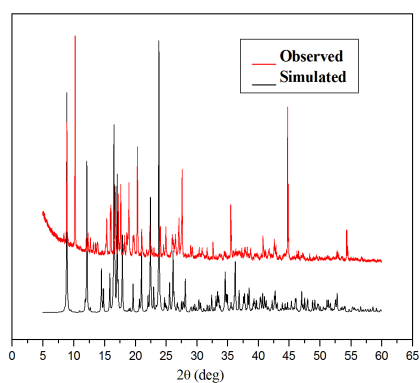

(c)

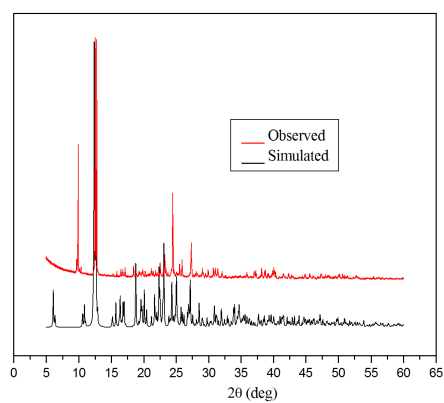

(d)

Fig. S3. Experimental and simulated powder X-ray diffraction (PXRD) patterns for complexes **1–4** (a–d).



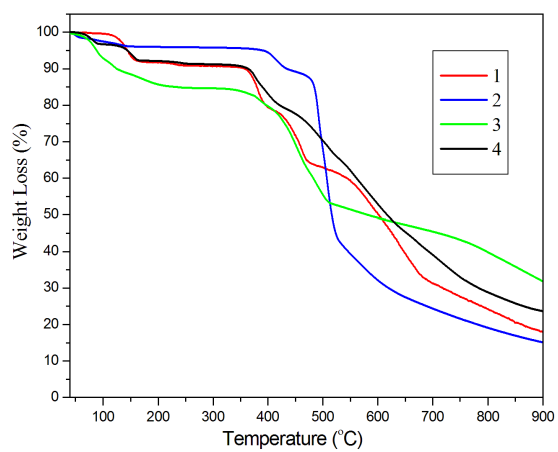

Fig. S4 TGA curves for complexes 1–4.
